# Supplementary material
Source: PubMed Central journal article supplement (PMC2939837)
Supplement: NIHMS160892-supplement-6.pdf [file NIHMS160892-supplement-6.pdf]

| <b>Primer</b> | <b>Date</b> | <b>Sequence</b>       |
|---------------|-------------|-----------------------|
| ATF3 - F      | 13/06/2006  | GTGCCGAAACAAGAAGAAGG  |
| ATF3 - R      | 13/06/2006  | CGAGAGGAAGATGGGAGATG  |
|               |             |                       |
| B-actin - F   | 11/11/2005  | CACCTTCACCGTTCCAGTTT  |
| B-actin - F   | 10/04/2007  | CACCTTCACCGTTCCAGTTT  |
|               |             |                       |
| EGR1 - F      | 8/03/2006   | ATCCCCGACTACCTGTTTCC  |
| EGR1-R        | 8/03/2006   | GTTTGATGAGCTGGGACTGG  |
|               |             |                       |
| EGR3 - F      | 28/07/2006  | ATCTGTGGGGAGAAAGAGCA  |
| EGR3 - R      | 28/07/2006  | ATGATGGTGGGAAGGAGAAA  |
|               |             |                       |
| FOS - F       | 12/11/2005  | CAAGCGGAGACAGACCACT   |
| FOS - R       | 12/11/2005  | ATCAAGGGAAGCCACAGACA  |
|               |             |                       |
| GADD45B -F    | 18/04/2006  | ACCTGCATTGTCTCCTGGTC  |
| GADD45B - R   | 18/04/2006  | TGGCAGCAACTCAACAGATT  |
|               |             |                       |
| GAPDH - F     | 27/08/2004  | TCGGAGTCAACGGATTTGG   |
| GAPDH - R     | 27/08/2004  | GAATTTGCCATGGGTGGAAT  |
|               |             |                       |
| IGFBP3 - F    | 18/10/2005  | AGGGCACTCTGGGAACCTAT  |
| IGFBP3 - R    | 18/10/2005  | TGATGCCTCTGAATGTGGAG  |
|               |             |                       |
| JUN - F       | 12/11/2005  | TGACTGCAAAGATGGAAACG  |
| JUN - R       | 12/11/2005  | TGAGGAGGTCCGAGTTCTTG  |
|               |             |                       |
| MT1F - F      | 28/07/2006  | TGCTTCTTCGCTTCTCTCTTG |
| MT1F - R      | 28/07/2006  | AGGTTGTCCTGGCATCAGTC  |
|               |             |                       |
| p21 - F       | 5/05/2005   | ATGTGTCCTGGTTCCCGTTTC |
| p21 - R       | 5/05/2005   | CATTGTGGGAGGAGCTGTGA  |
|               |             |                       |
| SP1 - F       | 13/06/2006  | GGAAAGGGGCAGGATAACTC  |
| SP1 - R       | 13/06/2006  | AGAGAACAGGGCAAGTGGAA  |
|               |             |                       |
| SP3 - F       | 13/06/2006  | AGGGGACCAACAACATCAAG  |
| SP3 - R       | 13/06/2006  | ACAAACAAAAGGGCGTTCTC  |
